# Supplementary material for: Initiated Babesia ovata Sexual Stages under In Vitro Conditions Were Recognized by Anti-CCp2 Antibodies, Showing Changes in the DNA Content by Imaging Flow Cytometry
Source: PubMed Central journal article supplement (PMC6789521; doi:10.3390/pathogens8030104), 2019-07-17
Supplement: pathogens-08-00104-s001.pdf [file pathogens-08-00104-s001.pdf]

## Supplementary Materials:

**Table S1.** Morphological changes of *B. ovata* sexual stages observed in different induction conditions.

| Inducer | Incubation temperature                             |                                                    |
|---------|----------------------------------------------------|----------------------------------------------------|
|         | 37 °C with 5% CO <sub>2</sub>                      | 27 °C in air                                       |
| XA      | Gametes and zygotes                                | Gametes and zygotes                                |
| TCEP    | Gametes and zygotes                                | Gametes and zygotes                                |
| DTT     | Aggregation forms, ray bodies, gametes and zygotes | Aggregation forms, ray bodies, gametes and zygotes |
| Control | None                                               | Gametes and zygotes                                |

Abbreviations: XA, Xanthurenic acid; TCEP, Tris(2-carboxyethyl)phosphine; DTT, Dithiothreitol.

**Table S2.** Parasitemia and proportion of different sexual stages of *B. ovata* *in vitro* culture at different time point post induction at 27 °C.

| <i>B. ovata</i>       | 0h             | 3h                     | 6h             | 9h             | 12h            | 24h            | 48h                 | 72h            |
|-----------------------|----------------|------------------------|----------------|----------------|----------------|----------------|---------------------|----------------|
| Parasitemia (%)       | 4.10<br>± 0.60 | 2.9<br>± 0.10          | 2.70<br>± 0.50 | 2.50<br>± 0.00 | 1.60<br>± 0.20 | 1.20<br>± 0.10 | 0.80<br>± 0.20      | 0.30<br>± 0.10 |
| Free merozoites (%)   | 0.17<br>± 0.02 | <b>0.50</b><br>± 0.05* | 0.30<br>± 0.07 | 0.20<br>± 0.09 | 0.20<br>± 0.03 | 0.25<br>± 0.03 | 0.20<br>± 0.10      | -              |
| Aggregation forms (%) | -              | -                      | -              | -              | -              | -              | 0.03<br>± 0.00      | -              |
| Gametocytes** (%)     | -              | -                      | -              | -              | -              | -              | 0.10<br>± 0.00      | -              |
| Zygotes*** (%)        | -              | -                      | -              | -              | 0.70<br>± 0.07 | 1.80<br>± 0.50 | <b>2.4</b><br>± 0.1 | -              |

The percentage was calculated by counting the number of merozoites/sexual forms in 3,000 erythrocytes in three independent experiments. \*Bold indicates the highest percentage of each sexual forms. \*\*Cells with one or two nucleus and short projections are considered gametocytes/ray bodies. \*\*\*Round, big cells with clear cytoplasm are considered Zygotes.

Nguyen et al., Supplementary Fig.1

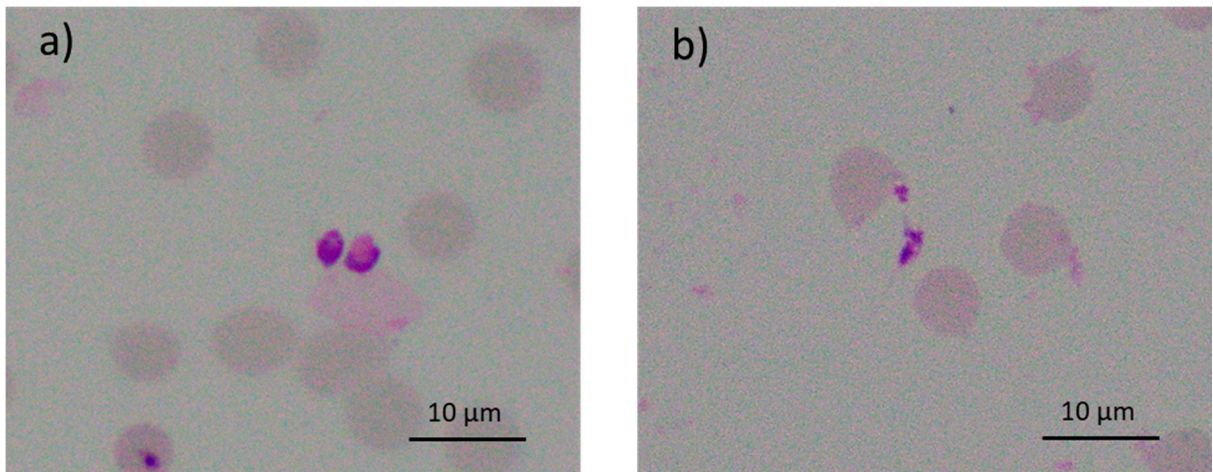

**Figure S1.** Extracellular cell forms in 60 mM DTT induced culture (a) Spherical forms at 3h pi. (b) Cell with long projection and clear cytoplasm might be a mature ray body 24h pi. .
